# Supplementary material
Source: publisher figshare collection journal article supplement (https://acs.figshare.com/ndownloader/files/21732963)
Supplement: Supplementary file 1 [file 21732963]

## Sheet: Sheet1
	Minimum distances (Rmin) associated with unobserved NOEs
	CAAU				UCAAUC				dCAAU				dUCAAUC
			Rmin				Rmin				Rmin				Rmin
	C1H1'	A2H2'	5.18253		U1H1'	C2H5'	4.98921		C1H1'	A3H4'	4.69723		U1H1'	U1H5'	4.20829
	C1H1'	A2H3'	4.61711		U1H1'	A3H2'	4.98921		C1H1'	A3H5'	4.18476		U1H1'	C2H2''	3.65406
	C1H1'	A2H4'	5.18253		U1H1'	A3H3'	4.44488		C1H1'	A3H5''	4.18476		U1H1'	A3H4'	4.5025
	C1H1'	A3H2	5.81719		U1H1'	A3H5'	4.98921		C1H1'	U4H3'	4.18476		U1H1'	A3H5'	4.01128
	C1H1'	A3H2'	5.18253		U1H1'	A3H5''	4.98921		C1H1'	U4H5	4.18476		U1H1'	A3H5''	4.01128
	C1H1'	A3H3'	4.61711		U1H1'	A4H3'	4.44488		C1H1'	U4H5'	4.18476		U1H1'	U5H2'	3.57364
	C1H1'	A3H4'	5.18253		U1H1'	A4H5''	4.98921		C1H1'	U4H5''	4.18476		U1H1'	U5H2''	3.57364
	C1H1'	A3H5'	5.18253		U1H1'	U5H1'	5.6002		C1H3'	A3H2'	4.18476		U1H1'	C6H2'	3.57364
	C1H1'	A3H5''	5.18253		U1H1'	U5H2'	4.98921		C1H3'	A3H2''	4.18476		U1H1'	C6H2''	3.57364
	C1H1'	A3H8	5.81719		U1H1'	U5H3'	4.98921		C1H3'	A3H5''	4.18476		U1H1'	C6H3'	4.01128
	C1H1'	U4H2'	5.18253		U1H1'	U5H4'	4.98921		C1H3'	U4H2'	3.59209		U1H1'	C6H5'	4.01128
	C1H1'	U4H3'	5.81719		U1H1'	U5H5	4.98921		C1H3'	U4H2''	4.18476		U1H1'	C6H5''	4.01128
	C1H1'	U4H4'	5.81719		U1H1'	U5H5'	4.98921		C1H4'	A2H2'	4.18476		U1H2'	U5H2''	3.18375
	C1H1'	U4H5	5.18253		U1H1'	U5H5''	4.98921		C1H4'	A2H2''	4.18476		U1H2'	C6H2''	3.18375
	C1H1'	U4H5'	5.18253		U1H1'	C6H2'	4.98921		C1H4'	A3H2'	4.69723		U1H2''	C2H2''	3.2554
	C1H1'	U4H5''	5.18253		U1H1'	C6H3'	4.98921		C1H4'	A3H2''	4.69723		U1H3'	A3H2'	3.57364
	C1H2'	A3H2'	4.61711		U1H1'	C6H4'	4.98921		C1H4'	U4H2'	4.03198		U1H3'	A3H2''	3.57364
	C1H2'	A3H4'	4.61711		U1H1'	C6H5''	4.98921		C1H4'	U4H2''	4.69723		U1H3'	A3H5'	4.01128
	C1H2'	A3H5''	4.61711		U1H2'	A3H5''	4.44488		C1H5	C1H2''	3.7282		U1H3'	A4H2'	4.01128
	C1H2'	U4H2'	4.61711		U1H3'	A3H5''	4.44488		C1H5	C1H3'	4.18476		U1H3'	A4H2''	4.01128
	C1H2'	U4H3'	5.18253		U1H2'	C6H5''	4.44488		C1H5	C1H4'	4.69723		U1H3'	A4H5'	4.20829
	C1H2'	U4H4'	5.18253		U1H3'	C6H5''	4.44488		C1H5	A2H2'	3.7282		U1H3'	A4H5''	4.20829
	C1H2'	U4H5'	4.61711		U1H5	U1H4'	4.98921		C1H5	A2H2''	3.7282		U1H3'	U5H2'	3.57364
	C1H2'	U4H5''	4.61711		U1H5	U1H5'	4.44488		C1H5	A2H4'	4.69723		U1H3'	U5H4'	4.5025
	C1H3'	A3H2'	4.11338		U1H5	C2H2'	4.44488		C1H5	A2H5'	4.18476		U1H3'	U5H5''	4.01128
	C1H3'	A3H5''	4.11338		U1H5	C2H3'	4.44488		C1H5	A2H5''	4.18476		U1H3'	C6H2'	3.57364
	C1H3'	U4H2'	4.11338		U1H5	C2H4'	4.44488		C1H5	A3H4'	4.69723		U1H3'	C6H2''	3.57364
	C1H3'	U4H5''	4.11338		U1H5	C2H5'	4.44488		C1H5	A3H5'	4.18476		U1H3'	C6H5'	4.01128
	C1H4'	A2H5''	4.61711		U1H5	C2H5''	4.44488		C1H5	A3H5''	4.18476		U1H3'	C6H5''	4.01128
	C1H4'	A3H5''	4.61711		U1H5	A3H2'	4.44488		C1H5	U4H4'	4.18476		U1H4'	A3H2''	4.01128
	C1H5	H2'	4.61711		U1H5	A3H3'	3.95994		C1H5	U4H5	4.18476		U1H5	U1H2'	3.57364
	C1H5	H4'	4.61711		U1H5	A3H4'	4.44488		C1H5	U4H5'	4.18476		U1H5	U1H4'	4.5025
	C1H5	H5'	4.61711		U1H5	A3H5'	4.44488		C1H5	U4H5''	4.18476		U1H5	U1H5'	4.20829
	C1H5	H5''	4.61711		U1H5	A3H5''	4.44488		C1H5'	A2H2'	4.18476		U1H5	C2H2'	3.57364
	C1H5	A2H2'	4.61711		U1H5	A4H3'	3.95994		C1H5''	A2H2'	4.18476		U1H5	C2H2''	3.65406
	C1H5	A2H3'	4.11338		U1H5	A4H4'	4.44488		C1H5'	A2H2''	4.18476		U1H5	C2H3'	4.01128
	C1H5	A2H4'	4.61711		U1H5	A4H5'	4.44488		C1H5''	A2H2''	4.18476		U1H5	C2H4'	4.5025
	C1H5	A2H5'	4.61711		U1H5	A4H5''	4.44488		C1H5'	A3H2'	4.69723		U1H5	C2H5'	4.5025
	C1H5	A2H5''	4.61711		U1H5	U5H1'	4.98921		C1H5''	A3H2'	4.69723		U1H5	C2H5''	4.5025
	C1H5	A3H2'	4.61711		U1H5	U5H2'	4.44488		C1H5'	A3H2''	4.69723		U1H5	A3H2'	3.57364
	C1H5	A3H3'	4.11338		U1H5	U5H3'	4.44488		C1H5''	A3H2''	4.69723		U1H5	A3H2''	3.57364
	C1H5	A3H4'	4.61711		U1H5	U5H4'	4.44488		C1H5'	U4H2'	4.03198		U1H5	A3H4'	4.5025
	C1H5	A3H5'	4.61711		U1H5	U5H5'	4.44488		C1H5''	U4H2'	4.03198		U1H5	A3H5'	4.01128
	C1H5	A3H5''	4.61711		U1H5	U5H5''	4.44488		C1H5'	U4H2''	4.69723		U1H5	A3H5''	4.01128
	C1H5	U4H2'	4.61711		U1H5	C6H2'	4.44488		C1H5''	U4H2''	4.69723		U1H5	A4H2'	4.01128
	C1H5	U4H3'	5.18253		U1H5	C6H3'	4.44488		C1H6	A2H1'	3.91131		U1H5	A4H2''	4.01128
	C1H5	U4H4'	5.18253		U1H5	C6H4'	4.44488		C1H6	A2H2'	3.7282		U1H5	A4H4'	4.5025
	C1H5	U4H5	4.61711		U1H5	C6H5'	4.44488		C1H6	A2H2''	3.7282		U1H5	A4H5'	4.20829
	C1H5	U4H5'	4.61711		U1H5	C6H5''	4.44488		C1H6	A2H4'	4.69723		U1H5	A4H5''	4.20829
	C1H5	U4H5''	4.61711		U1H6	C2H3'	4.44488		C1H6	A2H5'	4.18476		U1H5	U5H2'	3.57364
	C1H6	A2H2'	4.61711		U1H6	C2H4'	4.44488		C1H6	A3H1'	4.18476		U1H5	U5H2''	3.57364
	C1H6	A2H3'	4.11338		U1H6	C2H5''	4.44488		C1H6	A3H4'	4.69723		U1H5	U5H3'	4.01128
	C1H6	A2H4'	4.61711		U1H6	A3H2'	4.44488		C1H6	A3H5'	4.18476		U1H5	U5H4'	4.5025
	C1H6	A2H5''	4.61711		U1H6	A3H3'	3.95994		C1H6	A3H5''	4.18476		U1H5	U5H5'	4.01128
	C1H6	A3H1'	5.18253		U1H6	A3H4'	4.44488		C1H6	U4H1'	4.18476		U1H5	U5H5''	4.01128
	C1H6	A3H2'	4.61711		U1H6	A3H5'	4.44488		C1H6	U4H2'	3.59209		U1H5	C6H2'	3.57364
	C1H6	A3H3'	4.11338		U1H6	A3H5''	4.44488		C1H6	U4H2''	4.18476		U1H5	C6H2''	3.57364
	C1H6	A3H4'	4.61711		U1H6	A4H1'	4.98921		C1H6	U4H3'	4.18476		U1H5	C6H3'	4.01128
	C1H6	A3H5'	4.61711		U1H6	A4H3'	3.95994		C1H6	U4H4'	4.18476		U1H5	C6H4'	4.20829
	C1H6	A3H5''	4.61711		U1H6	A4H5''	4.44488		C1H6	U4H5	4.18476		U1H5	C6H5'	4.01128
	C1H6	U4H1'	4.61711		U1H6	U5H1'	4.98921		C1H6	U4H5'	4.18476		U1H5	C6H5''	4.01128
	C1H6	U4H2'	4.61711		U1H6	U5H2'	4.44488		C1H6	U4H5''	4.18476		U1H5'	C2H2'	3.74916
	C1H6	U4H3'	5.18253		U1H6	U5H3'	4.44488		A2H1'	C1H1'	3.91131		U1H5'	C2H2''	3.83353
	C1H6	U4H4'	5.18253		U1H6	U5H4'	4.44488		A2H1'	C1H2'	3.48458		U1H5'	A3H2'	3.74916
	C1H6	U4H5	4.61711		U1H6	U5H5	4.44488		A2H1'	C1H2''	3.48458		U1H5'	A3H2''	3.74916
	C1H6	U4H5'	4.61711		U1H6	U5H5'	4.44488		A2H1'	C1H3'	3.91131		U1H5'	A4H2'	4.20829
	C1H6	U4H5''	4.61711		U1H6	U5H5''	4.44488		A2H1'	C1H4'	4.39029		U1H5'	A4H2''	4.20829
	A2H1'	C1H4'	5.18253		U1H6	C6H1'	4.44488		A2H1'	C1H5	3.91131		U1H5'	U5H2'	3.74916
	A2H1'	C1H5	5.18253		U1H6	C6H2'	4.44488		A2H1'	U4H2'	3.35737		U1H5'	U5H2''	3.74916
	A2H1'	C1H5'	5.18253		U1H6	C6H3'	4.44488		A2H1'	U4H2''	3.91131		U1H5'	C6H2'	3.74916
	A2H1'	C1H5''	5.18253		U1H6	C6H4'	4.44488		A2H1'	U4H3'	3.91131		U1H5'	C6H2''	3.74916
	A2H1'	A3H4'	5.18253		U1H6	C6H5	4.44488		A2H1'	U4H5	3.91131		U1H5''	U1H2'	3.74916
	A2H1'	A3H5''	5.18253		U1H6	C6H5''	4.44488		A2H1'	U4H5''	3.91131		U1H5''	C2H2'	3.74916
	A2H1'	U4H1'	5.18253		C2H1'	U1H4'	5.6002		A2H2	C1H1'	4.69723		U1H5''	C2H2''	3.83353
	A2H1'	U4H2'	5.18253		C2H1'	U1H5	4.98921		A2H2	C1H2'	4.18476		U1H5''	A3H2'	3.74916
	A2H1'	U4H4'	5.81719		C2H1'	A3H2'	4.98921		A2H2	C1H2''	4.18476		U1H5''	A3H2''	3.74916
	A2H1'	U4H5	5.18253		C2H1'	A3H3'	4.44488		A2H2	C1H3'	4.69723		U1H5''	A4H2'	4.20829
	A2H1'	U4H5'	5.18253		C2H1'	A4H3'	4.44488		A2H2	C1H4'	5.27247		U1H5''	A4H2''	4.20829
	A2H1'	U4H5''	5.18253		C2H1'	A4H5''	4.98921		A2H2	C1H5	4.69723		U1H5''	U5H2'	3.74916
	A2H2	C1H1'	5.81719		C2H1'	U5H1'	5.6002		A2H2	C1H6	4.69723		U1H5''	U5H2''	3.74916
	A2H2	C1H2'	5.18253		C2H1'	U5H2'	4.98921		A2H2	A2H2'	4.18476		U1H5''	C6H2'	3.74916
	A2H2	C1H3'	4.61711		C2H1'	U5H5	4.98921		A2H2	A2H4'	5.27247		U1H5''	C6H2''	3.74916
	A2H2	C1H4'	5.18253		C2H1'	U5H5''	4.98921		A2H2	A2H5'	4.69723		U1H6	U1H4'	4.5025
	A2H2	C1H5	5.18253		C2H1'	C6H2'	4.98921		A2H2	A3H4'	5.27247		U1H6	C2H2'	3.57364
	A2H2	C1H5'	5.18253		C2H1'	C6H3'	4.98921		A2H2	A3H5'	4.69723		U1H6	C2H2''	3.65406
	A2H2	C1H5''	5.18253		C2H1'	C6H4'	4.98921		A2H2	A3H5''	4.69723		U1H6	C2H3'	4.01128
	A2H2	C1H6	5.18253		C2H1'	C6H5'	4.98921		A2H2	U4H1'	4.69723		U1H6	C2H4'	4.5025
	A2H2	H3'	4.61711		C2H2'	U1H5'	4.44488		A2H2	U4H2'	4.03198		U1H6	C2H5'	4.5025
	A2H2	H4'	5.18253		C2H2'	U1H5''	4.44488		A2H2	U4H2''	4.69723		U1H6	C2H5''	4.5025
	A2H2	H5'	5.18253		C2H2'	C6H2'	4.44488		A2H2	U4H3'	4.69723		U1H6	A3H1'	3.74916
	A2H2	H5''	5.18253		C2H2'	C6H5''	4.44488		A2H2	U4H4'	4.69723		U1H6	A3H2'	3.57364
	A2H2	A3H2'	5.18253		C2H3'	U1H5'	4.44488		A2H2	U4H5	4.69723		U1H6	A3H2''	3.57364
	A2H2	A3H3'	4.61711		C2H3'	U1H5''	4.44488		A2H2	U4H5'	4.69723		U1H6	A3H4'	4.5025
	A2H2	A3H4'	5.18253		C2H3'	U5H5''	4.44488		A2H2	U4H5''	4.69723		U1H6	A3H5'	4.01128
	A2H2	A3H5'	5.18253		C2H3'	C6H2'	4.44488		A2H2	U4H6	4.69723		U1H6	A3H5''	4.01128
	A2H2	A3H5''	5.18253		C2H3'	C6H5''	4.44488		A2H2'	C1H2'	3.32145		U1H6	A4H2'	4.01128
	A2H2	U4H1'	5.18253		C2H4'	U1H5'	4.44488		A2H2'	U4H2'	3.20019		U1H6	A4H2''	4.01128
	A2H2	U4H2'	5.18253		C2H4'	U1H5''	4.44488		A2H2'	U4H2''	3.7282		U1H6	A4H4'	4.5025
	A2H2	U4H3'	5.81719		C2H4'	C6H2'	4.44488		A2H2''	C1H2'	3.32145		U1H6	A4H5'	4.20829
	A2H2	U4H4'	5.81719		C2H4'	C6H5''	4.44488		A2H2''	C1H2''	3.32145		U1H6	A4H5''	4.20829
	A2H2	U4H5	5.18253		C2H5	U1H4'	4.98921		A2H2''	U4H2'	3.20019		U1H6	U5H2'	3.57364
	A2H2	U4H5'	5.18253		C2H5	C2H5'	4.44488		A2H2''	U4H2''	3.7282		U1H6	U5H3'	4.01128
	A2H2	U4H5''	5.18253		C2H5	A3H2'	4.44488		A2H3'	C1H1'	4.18476		U1H6	U5H4'	4.5025
	A2H2	U4H6	5.18253		C2H5	A3H3'	3.95994		A2H3'	C1H2'	3.7282		U1H6	U5H5	4.01128
	A2H2'	C1H4'	4.61711		C2H5	A3H5'	4.44488		A2H3'	C1H4'	4.69723		U1H6	U5H5'	4.01128
	A2H2'	C1H5'	4.61711		C2H5	A3H5''	4.44488		A2H3'	C1H5	4.18476		U1H6	U5H5''	4.01128
	A2H2'	C1H5''	4.61711		C2H5	A4H3'	3.95994		A2H3'	C1H6	4.18476		U1H6	U5H6	4.01128
	A2H2'	U4H2'	4.61711		C2H5	U5H2'	4.44488		A2H3'	A2H2	4.69723		U1H6	C6H1'	4.01128
	A2H2'	U4H3'	5.18253		C2H5	U5H3'	4.44488		A2H3'	A3H1'	4.18476		U1H6	C6H2''	3.57364
	A2H2'	U4H5'	4.61711		C2H5	U5H4'	4.44488		A2H3'	A3H2	4.69723		U1H6	C6H3'	4.01128
	A2H2'	U4H5''	4.61711		C2H5	U5H5	4.44488		A2H3'	U4H2'	3.59209		U1H6	C6H5'	4.01128
	A2H3'	C1H2'	4.11338		C2H5	U5H5'	4.44488		A2H3'	U4H2''	4.18476		U1H6	C6H5''	4.01128
	A2H3'	C1H4'	4.11338		C2H5	U5H5''	4.44488		A2H3'	U4H3'	4.18476		C2H1'	U1H2'	3.57364
	A2H3'	C1H5'	4.11338		C2H5	C6H2'	4.44488		A2H3'	U4H5	4.18476		C2H1'	U1H3'	4.01128
	A2H3'	C1H5''	4.11338		C2H5	C6H3'	4.44488		A2H3'	U4H5''	4.18476		C2H1'	U1H5'	4.20829
	A2H3'	A3H4'	4.11338		C2H5	C6H4'	4.44488		A2H3'	U4H6	4.18476		C2H1'	C6H2''	3.57364
	A2H3'	U4H2'	4.11338		C2H5	C6H5'	4.44488		A2H4'	A3H2'	4.69723		C2H1'	C6H3'	4.01128
	A2H3'	U4H3'	4.61711		C2H5	C6H5''	4.44488		A2H4'	A3H2''	4.69723		C2H3'	A4H5'	4.20829
	A2H3'	U4H4'	4.61711		C2H5'	U1H5'	4.44488		A2H4'	U4H2'	4.03198		C2H3'	A4H5'	4.20829
	A2H3'	U4H5'	4.11338		C2H5'	U1H5''	4.44488		A2H4'	U4H2''	4.69723		C2H3'	A4H5''	4.20829
	A2H3'	U4H5''	4.11338		C2H5'	A3H5''	4.44488		A2H5'	C1H2'	3.7282		C2H3'	U5H2'	3.57364
	A2H4'	C1H4'	4.61711		C2H5''	U1H5'	4.44488		A2H5'	A3H2'	4.18476		C2H3'	U5H2''	3.57364
	A2H4'	C1H5'	4.61711		C2H5''	U1H5''	4.44488		A2H5'	A3H2''	4.18476		C2H3'	U5H4'	4.5025
	A2H4'	C1H5''	4.61711		C2H5''	U5H5''	4.44488		A2H5'	U4H2'	3.59209		C2H3'	U5H5'	4.01128
	A2H4'	A3H2'	4.61711		C2H5''	C6H5''	4.44488		A2H5'	U4H2''	4.18476		C2H3'	C6H2'	3.57364
	A2H4'	U4H2'	4.61711		C2H6	A3H3'	3.95994		A2H5''	C1H2'	3.7282		C2H3'	C6H2''	3.57364
	A2H4'	U4H3'	5.18253		C2H6	A4H1'	4.98921		A2H5''	A3H2'	4.18476		C2H3'	C6H3'	4.01128
	A2H4'	U4H4'	5.18253		C2H6	A4H3'	3.95994		A2H5''	A3H2''	4.18476		C2H3'	C6H5''	4.01128
	A2H4'	U4H5'	4.61711		C2H6	U5H1'	4.98921		A2H5''	U4H2'	3.59209		C2H5	U1H5'	4.20829
	A2H4'	U4H5''	4.61711		C2H6	U5H5	4.44488		A2H5''	U4H2''	4.18476		C2H5	A3H2'	3.57364
	A2H5'	C1H5'	4.61711		C2H6	U5H5''	4.44488		A2H8	C1H5	4.69723		C2H5	A3H2''	3.57364
	A2H5'	C1H5''	4.61711		C2H6	C6H5	4.44488		A2H8	A3H2	5.27247		C2H5	A3H4'	4.5025
	A2H5'	A3H2'	4.61711		C2H6	C6H5'	4.44488		A2H8	U4H1'	4.69723		C2H5	A3H5'	4.01128
	A2H5'	A3H5''	4.61711		C2H6	C6H5''	4.44488		A2H8	U4H2'	4.03198		C2H5	A3H5''	4.01128
	A2H5'	U4H2'	4.61711		A3H1'	U1H1'	5.6002		A2H8	U4H2''	4.69723		C2H5	A4H2'	4.01128
	A2H5'	U4H5''	4.61711		A3H1'	U1H5	4.98921		A2H8	U4H3'	4.69723		C2H5	A4H2''	4.01128
	A2H5''	C1H5'	4.61711		A3H1'	C2H3'	4.98921		A2H8	U4H5'	4.69723		C2H5	A4H4'	4.5025
	A2H5''	C1H5''	4.61711		A3H1'	C2H5	4.98921		A2H8	U4H5''	4.69723		C2H5	A4H5'	4.20829
	A2H5''	A3H5''	4.61711		A3H1'	U5H5''	4.98921		A2H8	U4H6	4.69723		C2H5	A4H5''	4.20829
	A2H5''	U4H2'	4.61711		A3H1'	C6H1'	4.98921		A3H1'	C1H1'	4.18476		C2H5	U5H2'	3.57364
	A2H5''	U4H5''	4.61711		A3H2	C2H4'	4.98921		A3H1'	C1H2'	3.7282		C2H5	U5H2''	3.57364
	A2H8	H2	5.81719		A3H2	C2H5'	4.98921		A3H1'	C1H2''	3.7282		C2H5	U5H3'	4.01128
	A2H8	A3H1'	5.81719		A3H2	C2H5''	4.98921		A3H1'	C1H3'	4.18476		C2H5	U5H4'	4.5025
	A2H8	A3H2	5.81719		A3H2	A3H3'	4.44488		A3H1'	C1H4'	4.69723		C2H5	U5H5''	4.01128
	A2H8	A3H3'	4.61711		A3H2	A3H5'	4.98921		A3H1'	C1H5	4.18476		C2H5	C6H2'	3.57364
	A2H8	A3H4'	5.18253		A3H2	A3H5''	4.98921		A3H1'	A2H2''	3.7282		C2H5	C6H2''	3.57364
	A2H8	A3H5''	5.18253		A3H2	A4H5''	4.98921		A3H1'	A2H4'	4.69723		C2H5	C6H3'	4.01128
	A2H8	U4H1'	5.18253		A3H2	U5H1'	5.6002		A3H1'	A2H5'	4.18476		C2H5	C6H4'	4.20829
	A2H8	U4H2'	5.18253		A3H2	U5H2'	4.98921		A3H1'	U4H2'	3.59209		C2H5	C6H5'	4.01128
	A2H8	U4H3'	5.81719		A3H2	U5H3'	4.98921		A3H1'	U4H2''	4.18476		C2H5	C6H5''	4.01128
	A2H8	U4H4'	5.81719		A3H2	U5H4'	4.98921		A3H1'	U4H3'	4.18476		C2H5'	A4H2'	4.5025
	A2H8	U4H5	5.18253		A3H2	U5H5	4.98921		A3H2	C1H1'	4.69723		C2H5'	A4H2''	4.5025
	A2H8	U4H5'	5.18253		A3H2	U5H5'	4.98921		A3H2	C1H2'	4.18476		C2H5'	U5H2'	4.01128
	A2H8	U4H5''	5.18253		A3H2	U5H5''	4.98921		A3H2	C1H2''	4.18476		C2H5'	U5H2''	4.01128
	A2H8	U4H6	5.18253		A3H2	C6H1'	4.98921		A3H2	C1H3'	4.69723		C2H5'	C6H2'	4.01128
	A3H1'	C1H2'	5.18253		A3H2	C6H3'	4.98921		A3H2	C1H4'	5.27247		C2H5'	C6H2''	4.01128
	A3H1'	C1H3'	4.61711		A3H2	C6H4'	4.98921		A3H2	C1H5	4.69723		C2H5''	A4H2'	4.5025
	A3H1'	C1H4'	5.18253		A3H2	C6H5	4.98921		A3H2	C1H6	4.69723		C2H5''	A4H2''	4.5025
	A3H1'	C1H5	5.18253		A3H2	C6H5''	4.98921		A3H2	A2H1'	4.39029		C2H5''	U5H2'	4.01128
	A3H1'	C1H5'	5.18253		A3H2'	U1H4'	4.98921		A3H2	A2H2'	4.18476		C2H5''	U5H2''	4.01128
	A3H1'	C1H5''	5.18253		A3H2'	U1H5'	4.44488		A3H2	A2H2''	4.18476		C2H5''	C6H2'	4.01128
	A3H1'	A2H5'	5.18253		A3H2'	U1H5''	4.44488		A3H2	A2H4'	5.27247		C2H5''	C6H2''	4.01128
	A3H1'	A2H5''	5.18253		A3H2'	C2H5'	4.44488		A3H2	A2H5'	4.69723		C2H6	U1H5	4.01128
	A3H1'	U4H1'	5.18253		A3H2'	U5H4'	4.44488		A3H2	A2H5''	4.69723		C2H6	U1H5'	4.20829
	A3H2	C1H1'	5.81719		A3H2'	U5H5'	4.44488		A3H2	A2H5''	4.69723		C2H6	A3H1'	3.74916
	A3H2	C1H2'	5.18253		A3H2'	U5H5''	4.44488		A3H2	A3H4'	5.27247		C2H6	A3H2'	3.57364
	A3H2	C1H3'	4.61711		A3H2'	C6H2'	4.44488		A3H2	A3H5'	4.69723		C2H6	A3H2''	3.57364
	A3H2	C1H4'	5.18253		A3H2'	C6H5'	4.44488		A3H2	A3H5''	4.69723		C2H6	A3H4'	4.5025
	A3H2	C1H5	5.18253		A3H2'	C6H5''	4.44488		A3H2	U4H3'	4.69723		C2H6	A3H5'	4.01128
	A3H2	C1H5'	5.18253		A3H3'	U1H4'	4.44488		A3H2	U4H4'	4.69723		C2H6	A4H2''	4.01128
	A3H2	C1H5''	5.18253		A3H3'	U1H5'	3.95994		A3H2	U4H5	4.69723		C2H6	A4H4'	4.5025
	A3H2	C1H6	5.18253		A3H3'	U1H5''	3.95994		A3H2	U4H5'	4.69723		C2H6	A4H5'	4.20829
	A3H2	A2H2'	5.18253		A3H3'	C2H5'	3.95994		A3H2	U4H5''	4.69723		C2H6	A4H5''	4.20829
	A3H2	A2H3'	4.61711		A3H3'	C2H5''	3.95994		A3H2	U4H6	4.69723		C2H6	U5H2'	3.57364
	A3H2	A2H4'	5.18253		A3H3'	U5H4'	3.95994		A3H2'	C1H2'	3.7282		C2H6	U5H3'	4.01128
	A3H2	A2H5'	5.18253		A3H3'	U5H5'	3.95994		A3H2'	C1H2''	3.7282		C2H6	U5H4'	4.5025
	A3H2	A2H5''	5.18253		A3H3'	U5H5''	3.95994		A3H2''	C1H2''	3.7282		C2H6	U5H5''	4.01128
	A3H2	H3'	4.61711		A3H3'	C6H2'	3.95994		A3H2'	U4H2'	3.59209		C2H6	C6H1'	4.01128
	A3H2	H4'	5.18253		A3H3'	C6H5'	3.95994		A3H2''	U4H2'	3.59209		C2H6	C6H2'	3.57364
	A3H2	H5'	5.18253		A3H3'	C6H5''	3.95994		A3H2'	U4H2''	4.18476		C2H6	C6H2''	3.57364
	A3H2	H5''	5.18253		A3H4'	U1H5'	4.44488		A3H2''	U4H2''	4.18476		C2H6	C6H3'	4.01128
	A3H2	U4H2'	5.18253		A3H4'	U1H5''	4.44488		A3H3'	C1H1'	4.18476		C2H6	C6H5'	4.01128
	A3H2	U4H3'	5.81719		A3H4'	U5H5''	4.44488		A3H3'	C1H2'	3.7282		C2H6	C6H5''	4.01128
	A3H2	U4H4'	5.81719		A3H4'	C6H2'	4.44488		A3H3'	C1H2''	3.7282		A3H1'	U1H2'	3.34012
	A3H2	U4H5	5.18253		A3H4'	C6H5''	4.44488		A3H3'	C1H6	4.18476		A3H1'	U1H2''	3.34012
	A3H2	U4H5'	5.18253		A3H5'	U1H5'	4.44488		A3H3'	A2H5'	4.18476		A3H1'	U1H3'	3.74916
	A3H2	U4H5''	5.18253		A3H5'	U1H5''	4.44488		A3H3'	A3H2	4.69723		A3H1'	U1H4'	4.20829
	A3H2	U4H6	5.18253		A3H5''	U1H5'	4.44488		A3H4'	C1H2'	4.18476		A3H1'	U1H4'	4.20829
	A3H2'	C1H5'	4.61711		A3H5''	U1H5''	4.44488		A3H4'	C1H2''	4.18476		A3H1'	U1H5'	3.9333
	A3H2'	C1H5''	4.61711		A3H5''	C2H5''	4.44488		A3H4'	C1H4'	5.27247		A3H1'	U5H2'	3.34012
	A3H2'	A2H5''	4.61711		A3H5''	A4H5''	4.44488		A3H4'	A2H5'	4.69723		A3H1'	U5H2''	3.34012
	A3H3'	C1H2'	4.11338		A3H5''	U5H5''	4.44488		A3H4'	U4H2'	4.03198		A3H1'	U5H3'	3.74916
	A3H3'	C1H3'	3.6646		A3H5''	C6H2'	4.44488		A3H4'	U4H2''	4.69723		A3H1'	U5H5''	3.74916
	A3H3'	C1H4'	4.11338		A3H5''	C6H5''	4.44488		A3H5'	C1H2'	3.7282		A3H1'	C6H2'	3.34012
	A3H3'	C1H5'	4.11338		A3H8	U1H5	4.98921		A3H5'	C1H2''	3.7282		A3H1'	C6H2''	3.34012
	A3H3'	C1H5''	4.11338		A3H8	U1H5'	4.98921		A3H5'	C1H4'	4.69723		A3H1'	C6H3'	3.74916
	A3H3'	A2H5'	4.11338		A3H8	U5H1'	5.6002		A3H5'	A2H5'	4.18476		A3H1'	C6H5''	3.74916
	A3H3'	A2H5''	4.11338		A3H8	U5H5	4.98921		A3H5''	C1H2'	3.7282		A3H2	U1H2'	4.01128
	A3H3'	U4H5'	4.11338		A3H8	U5H5''	4.98921		A3H5''	C1H2''	3.7282		A3H2	U1H3'	4.5025
	A3H4'	C1H3'	4.11338		A3H8	C6H1'	4.98921		A3H5''	U4H2'	3.59209		A3H2	U1H4'	5.05389
	A3H4'	C1H4'	4.61711		A3H8	C6H2'	4.98921		A3H5''	U4H2''	4.18476		A3H2	U1H4'	5.05389
	A3H4'	C1H5'	4.61711		A3H8	C6H5	4.98921		A3H8	C1H1'	4.69723		A3H2	U1H5'	4.72365
	A3H4'	C1H5''	4.61711		A3H8	C6H5''	4.98921		A3H8	C1H2'	4.18476		A3H2	C2H2'	4.01128
	A3H4'	A2H5'	4.61711		A4H1'	U1H4'	5.6002		A3H8	C1H2''	4.18476		A3H2	C2H2''	4.10155
	A3H4'	A2H5''	4.61711		A4H1'	U1H5	4.98921		A3H8	C1H3'	4.69723		A3H2	C2H3'	4.5025
	A3H4'	U4H2'	4.61711		A4H1'	U1H5'	4.98921		A3H8	C1H4'	5.27247		A3H2	C2H4'	5.05389
	A3H4'	U4H5'	4.61711		A4H1'	U1H5''	4.98921		A3H8	C1H5	4.69723		A3H2	C2H5'	5.05389
	A3H4'	U4H5''	4.61711		A4H1'	C2H5	4.98921		A3H8	C1H6	4.69723		A3H2	C2H5''	5.05389
	A3H5'	C1H4'	4.61711		A4H1'	A3H5''	4.98921		A3H8	A2H2	5.27247		A3H2	A3H2'	4.01128
	A3H5'	C1H5'	4.61711		A4H1'	C6H2'	4.98921		A3H8	A2H5'	4.69723		A3H2	A3H2''	4.01128
	A3H5'	C1H5''	4.61711		A4H1'	C6H3'	4.98921		A3H8	A2H5''	4.69723		A3H2	A3H4'	5.05389
	A3H5'	U4H2'	4.61711		A4H1'	C6H5'	4.98921		A3H8	A3H2	5.27247		A3H2	A3H5'	4.5025
	A3H5'	U4H5'	4.61711		A4H1'	C6H5''	4.98921		A3H8	U4H2'	4.03198		A3H2	A3H5''	4.5025
	A3H5'	U4H5''	4.61711		A4H2	U1H1'	5.6002		A3H8	U4H2''	4.69723		A3H2	A4H2'	4.5025
	A3H5''	C1H5'	4.61711		A4H2	U1H2'	4.98921		A3H8	U4H3'	4.69723		A3H2	A4H2''	4.5025
	A3H5''	C1H5''	4.61711		A4H2	U1H3'	4.98921		A3H8	U4H4'	4.69723		A3H2	A4H4'	5.05389
	A3H8	C1H1'	5.81719		A4H2	U1H4'	5.6002		A3H8	U4H5''	4.69723		A3H2	A4H5'	4.72365
	A3H8	C1H4'	5.18253		A4H2	U1H5	4.98921		U4H1'	C1H1'	4.18476		A3H2	A4H5''	4.72365
	A3H8	C1H5	5.18253		A4H2	U1H5'	4.98921		U4H1'	C1H2'	3.7282		A3H2	U5H2'	4.01128
	A3H8	C1H5'	5.18253		A4H2	U1H5''	4.98921		U4H1'	C1H2''	3.7282		A3H2	U5H2''	4.01128
	A3H8	C1H5''	5.18253		A4H2	U1H5''	4.98921		U4H1'	C1H3'	4.18476		A3H2	U5H3'	4.5025
	A3H8	U4H1'	5.18253		A4H2	C2H1'	5.6002		U4H1'	C1H4'	4.69723		A3H2	U5H4'	5.05389
	A3H8	U4H5'	5.18253		A4H2	C2H2'	4.98921		U4H1'	C1H5	4.18476		A3H2	U5H5	4.5025
	A3H8	U4H5''	5.18253		A4H2	C2H3'	4.98921		U4H1'	A2H2'	3.7282		A3H2	U5H5''	4.5025
	U4H1'	C1H1'	5.18253		A4H2	C2H4'	4.98921		U4H1'	A2H2''	3.7282		A3H2	U5H6	4.5025
	U4H1'	C1H2'	4.61711		A4H2	C2H5	4.98921		U4H1'	A2H4'	4.69723		A3H2	C6H1'	4.5025
	U4H1'	C1H3'	4.11338		A4H2	C2H5''	4.98921		U4H1'	A2H5'	4.18476		A3H2	C6H2'	4.01128
	U4H1'	C1H4'	4.61711		A4H2	A3H1'	5.6002		U4H1'	A2H5''	4.18476		A3H2	C6H2''	4.01128
	U4H1'	C1H5'	4.61711		A4H2	A3H2'	4.98921		U4H1'	A3H4'	4.69723		A3H2	C6H3'	4.5025
	U4H1'	C1H5''	4.61711		A4H2	A3H3'	4.44488		U4H1'	A3H5'	4.18476		A3H2	C6H4'	4.72365
	U4H1'	A2H2'	4.61711		A4H2	A3H4'	4.98921		U4H1'	A3H5''	4.18476		A3H2	C6H5'	4.5025
	U4H1'	A2H3'	4.11338		A4H2	A3H5'	4.98921		U4H1'	U4H5	4.18476		A3H2	C6H5''	4.5025
	U4H1'	A2H4'	4.61711		A4H2	A3H5''	4.98921		U4H2'	C1H2'	3.20019		A3H2'	U1H2'	3.18375
	U4H1'	A2H5'	4.61711		A4H2	A4H3'	4.44488		U4H2'	C1H2''	3.20019		A3H2'	U1H2''	3.18375
	U4H1'	A2H5''	4.61711		A4H2	A4H4'	4.98921		U4H2''	C1H2'	3.7282		A3H2'	U5H2'	3.18375
	U4H1'	A3H3'	4.11338		A4H2	A4H5''	4.98921		U4H2''	C1H2''	3.7282		A3H2'	U5H2''	3.18375
	U4H1'	A3H4'	4.61711		A4H2	U5H5	4.98921		U4H3'	C1H2'	3.7282		A3H2'	C6H2'	3.18375
	U4H1'	A3H5'	4.61711		A4H2	U5H5''	4.98921		U4H3'	C1H2''	3.7282		A3H2'	C6H2''	3.18375
	U4H1'	A3H5''	4.61711		A4H2	C6H1'	4.98921		U4H3'	C1H4'	4.69723		A3H2''	U1H2'	3.18375
	U4H1'	H5	4.61711		A4H2	C6H2'	4.98921		U4H3'	A2H2''	3.7282		A3H2''	U1H2''	3.18375
	U4H1'	H5'	4.61711		A4H2	C6H3'	4.98921		U4H3'	A2H5'	4.18476		A3H2''	U5H2'	3.18375
	U4H1'	H5''	4.61711		A4H2	C6H4'	4.98921		U4H3'	A2H5''	4.18476		A3H2''	U5H2''	3.18375
	U4H2'	C1H5'	4.61711		A4H2	C6H5	4.98921		U4H3'	A3H5''	4.18476		A3H2''	C6H2'	3.18375
	U4H2'	C1H5''	4.61711		A4H2	C6H5'	4.98921		U4H4'	C1H2'	3.7282		A3H2''	C6H2''	3.18375
	U4H3'	C1H5'	5.18253		A4H2	C6H5''	4.98921		U4H4'	A2H2'	3.7282		A3H3'	U1H2'	3.57364
	U4H3'	C1H5''	5.18253		A4H3'	U1H4'	4.44488		U4H5	C1H2'	3.7282		A3H3'	U1H2''	3.57364
	U4H4'	C1H5'	5.18253		A4H3'	U1H5'	3.95994		U4H5	C1H2''	3.7282		A3H3'	U1H5'	4.20829
	U4H4'	C1H5''	5.18253		A4H3'	U1H5''	3.95994		U4H5	C1H3'	4.18476		A3H3'	U5H2'	3.57364
	U4H5	C1H2'	4.61711		A4H3'	A3H5''	3.95994		U4H5	C1H4'	4.69723		A3H3'	U5H2''	3.57364
	U4H5	C1H3'	4.11338		A4H3'	C6H2'	3.95994		U4H5	A2H2'	3.7282		A3H3'	C6H2'	3.57364
	U4H5	C1H4'	4.61711		A4H3'	C6H3'	3.95994		U4H5	A2H2''	3.7282		A3H3'	C6H2''	3.57364
	U4H5	C1H5'	4.61711		A4H3'	C6H5'	3.95994		U4H5	A2H4'	4.69723		A3H4'	U1H2'	4.01128
	U4H5	C1H5''	4.61711		A4H3'	C6H5''	3.95994		U4H5	A2H5'	4.18476		A3H4'	U1H5'	4.72365
	U4H5	A2H2'	4.61711		A4H4'	U1H4'	4.98921		U4H5	A2H5''	4.18476		A3H4'	U5H2'	4.01128
	U4H5	A2H3'	4.11338		A4H4'	U1H5'	4.44488		U4H5	A3H5'	4.18476		A3H4'	U5H2''	4.01128
	U4H5	A2H4'	4.61711		A4H4'	U1H5''	4.44488		U4H5	A3H5''	4.18476		A3H4'	C6H2'	4.01128
	U4H5	A2H5'	4.61711		A4H4'	C6H2'	4.44488		U4H5	U4H3'	4.18476		A3H4'	C6H2''	4.01128
	U4H5	A2H5''	4.61711		A4H4'	C6H5''	4.44488		U4H5	U4H4'	4.18476		A3H5'	U1H2'	3.57364
	U4H5	A3H4'	4.61711		A4H5'	U1H5'	4.44488		U4H5	U4H5'	4.18476		A3H5'	U1H5'	4.20829
	U4H5	A3H5'	4.61711		A4H5'	U1H5''	4.44488		U4H5	U4H5''	4.18476		A3H5''	U1H2'	3.57364
	U4H5	A3H5''	4.61711		A4H5'	C6H5''	4.44488		U4H5'	C1H2'	3.7282		A3H5''	U1H5'	4.20829
	U4H5	H5'	4.61711		A4H5''	U1H5'	4.44488		U4H5'	C1H2''	3.7282		A3H5''	U5H2'	3.57364
	U4H5	H5''	4.61711		A4H5''	U1H5''	4.44488		U4H5'	C1H4'	4.69723		A3H5''	U5H2''	3.57364
	U4H5'	A2H5''	4.61711		A4H5''	U5H5''	4.44488		U4H5'	A2H2'	3.7282		A3H5''	C6H2'	3.57364
	U4H5'	A3H5''	4.61711		A4H8	U1H1'	5.6002		U4H5'	A2H2''	3.7282		A3H5''	C6H2''	3.57364
	U4H5''	C1H5'	4.61711		A4H8	U1H4'	5.6002		U4H5'	A2H5'	4.18476		A3H8	U1H2'	4.01128
	U4H5''	C1H5''	4.61711		A4H8	U1H5	4.98921		U4H5''	C1H2'	3.7282		A3H8	U1H5	4.5025
	U4H6	C1H1'	5.18253		A4H8	U1H5'	4.98921		U4H5''	C1H2''	3.7282		A3H8	U1H5'	4.72365
	U4H6	C1H2'	4.61711		A4H8	U1H5''	4.98921		U4H5''	A2H2'	3.7282		A3H8	U1H6	4.5025
	U4H6	C1H3'	4.11338		A4H8	C2H5	4.98921		U4H5''	A2H2''	3.7282		A3H8	U5H2'	4.01128
	U4H6	C1H5	4.61711		A4H8	C6H1'	4.98921		U4H6	C1H1'	4.18476		A3H8	U5H2''	4.01128
	U4H6	C1H5'	4.61711		A4H8	C6H2'	4.98921		U4H6	C1H2'	3.7282		A3H8	U5H3'	4.5025
	U4H6	C1H5''	4.61711		A4H8	C6H5'	4.98921		U4H6	C1H2''	3.7282		A3H8	U5H5	4.5025
	U4H6	A2H1'	5.18253		A4H8	C6H5''	4.98921		U4H6	C1H3'	4.18476		A3H8	U5H5''	4.5025
	U4H6	A2H2'	4.61711		U5H1'	U1H5'	4.98921		U4H6	C1H4'	4.69723		A3H8	U5H6	4.5025
	U4H6	A2H3'	4.11338		U5H1'	U1H5''	4.98921		U4H6	C1H5	4.18476		A3H8	C6H1'	4.5025
	U4H6	A2H4'	4.61711		U5H1'	C2H3'	4.98921		U4H6	C1H6	4.18476		A3H8	C6H2'	4.01128
	U4H6	A2H5'	4.61711		U5H1'	C2H4'	4.98921		U4H6	A2H1'	3.91131		A3H8	C6H2''	4.01128
	U4H6	A2H5''	4.61711		U5H1'	C2H5''	4.98921		U4H6	A2H2'	3.7282		A3H8	C6H3'	4.5025
	U4H6	A3H4'	4.61711		U5H1'	A3H2'	4.98921		U4H6	A2H2''	3.7282		A4H1'	U1H2''	3.57364
	U4H6	A3H5'	4.61711		U5H1'	A3H3'	4.44488		U4H6	A2H4'	4.69723		A4H1'	U1H3'	4.01128
	U4H6	A3H5''	4.61711		U5H1'	A3H4'	4.98921		U4H6	A2H5'	4.18476		A4H1'	U1H5'	4.20829
					U5H1'	A3H5''	4.98921		U4H6	A2H5''	4.18476		A4H1'	C2H2'	3.57364
	C1H1'	A2H5'	3.3		U5H1'	C6H2'	4.98921		U4H6	A3H4'	4.69723		A4H1'	C2H2''	3.65406
	C1H3'	A2H5''	3.3		U5H1'	C6H3'	4.98921		U4H6	A3H5''	4.18476		A4H1'	C2H3'	4.01128
	C1H3'	U4H5'	3.3		U5H2'	U1H5'	4.44488						A4H1'	C2H5'	4.5025
	C1H4'	U4H2'	3.3		U5H2'	U1H5''	4.44488		C1H1'	C1H5'	3.6		A4H1'	C2H5''	4.5025
	A2H1'	C1H1'	3.3		U5H3'	U1H5'	4.44488		C1H1'	C1H5''	3.6		A4H1'	A3H4'	4.5025
	A2H1'	C1H3'	3.3		U5H3'	U1H5''	4.44488		C1H1'	U4H4'	3.6		A4H1'	A3H5'	4.01128
	A2H1'	A3H1'	3.3		U5H4'	U1H5'	4.44488		C1H3'	A2H2'	3.6		A4H1'	A3H5''	4.01128
	A2H1'	A3H5'	3.3		U5H4'	U1H5''	4.44488		C1H3'	A2H2''	3.6		A4H1'	U5H2'	3.57364
	A2H2'	H5'	3.3		U5H4'	A3H5''	4.44488		C1H3'	A2H4'	3.6		A4H1'	C6H2'	3.57364
	A2H2'	A3H4'	3.3		U5H5	U1H2'	4.44488		C1H3'	A2H5''	3.6		A4H1'	C6H2''	3.57364
	A2H3'	C1H3'	3.3		U5H5	U1H3'	4.44488		C1H3'	A3H4'	3.6		A4H1'	C6H3'	4.01128
	A2H3'	A3H5'	3.3		U5H5	U1H4'	4.98921		C1H3'	A3H5'	3.6		A4H1'	C6H5'	4.01128
	A2H4'	C1H3'	3.3		U5H5	U1H5'	4.44488		C1H3'	U4H5'	3.6		A4H1'	C6H5''	4.01128
	A2H4'	A3H4'	3.3		U5H5	U1H5''	4.44488		C1H3'	U4H5''	3.6		A4H1'	C6H5''	4.01128
	A2H4'	A3H5''	3.3		U5H5	C2H3'	4.44488		C1H5	C1H5'	3.6		A4H2	U1H2'	4.01128
	A3H1'	A2H3'	3.3		U5H5	C2H4'	4.44488		C1H5	C1H5''	3.6		A4H2	U1H2''	4.01128
	A3H1'	H5'	3.3		U5H5	C2H5''	4.44488		C1H5	A3H2'	3.6		A4H2	U1H3'	4.5025
	A3H1'	H5''	3.3		U5H5	A3H3'	3.95994		C1H5	A3H2''	3.6		A4H2	U1H5	4.5025
	A3H1'	U4H5'	3.3		U5H5	A3H4'	4.44488		C1H5'	C1H2''	3.6		A4H2	U1H5'	4.72365
	A3H3'	A2H4'	3.3		U5H5	A3H5''	4.44488		C1H5''	C1H2''	3.6		A4H2	C2H2'	4.01128
	A3H5'	C1H3'	3.3		U5H5	C6H3'	4.44488		C1H6	A2H5''	3.6		A4H2	C2H2''	4.10155
	A3H5'	A2H5'	3.3		U5H5	C6H5'	4.44488		C1H6	A3H2'	3.6		A4H2	C2H3'	4.5025
	U4H3'	A3H5''	3.3		U5H5	C6H5''	4.44488		C1H6	A3H2''	3.6		A4H2	C2H5	4.5025
	U4H4'	A3H5''	3.3		U5H5'	U1H5'	4.44488		A2H1'	C1H5'	3.6		A4H2	C2H5'	5.05389
	U4H5'	C1H5'	3.3		U5H5'	U1H5''	4.44488		A2H1'	C1H5''	3.6		A4H2	C2H5''	5.05389
	U4H5'	C1H5''	3.3		U5H5''	U1H5'	4.44488		A2H1'	A2H5'	3.6		A4H2	C2H6	4.5025
	U4H6	H5''	3.3		U5H5''	U1H5''	4.44488		A2H1'	A2H5''	3.6		A4H2	A3H2'	4.01128
					U5H6	U1H1'	4.98921		A2H1'	U4H4'	3.6		A4H2	A3H2''	4.01128
	C1H1'	H5	4		U5H6	U1H4'	4.98921		A2H2	C1H5'	3.6		A4H2	A3H4'	5.05389
	C1H1'	H5'	4		U5H6	U1H5	4.44488		A2H2	C1H5''	3.6		A4H2	A3H5''	4.5025
	C1H1'	H5''	4		U5H6	U1H5'	4.44488		A2H2	A2H2''	3.6		A4H2	A4H4'	5.05389
	C1H1'	A2H5''	4		U5H6	U1H5''	4.44488		A2H2'	C1H2''	3.6		A4H2	U5H5'	4.5025
	C1H2'	H5'	4		U5H6	C2H1'	4.98921		A2H3'	C1H2''	3.6		A4H2	U5H5''	4.5025
	C1H2'	H5''	4		U5H6	C2H4'	4.44488		A2H3'	C1H3'	3.6		A4H2'	U1H2'	3.57364
	C1H2'	A3H5'	4		U5H6	C2H5	4.44488		A2H3'	C1H5'	3.6		A4H2'	C2H2'	3.57364
	C1H3'	U4H3'	4		U5H6	C2H5''	4.44488		A2H3'	C1H5''	3.6		A4H2'	U1H2''	3.57364
	C1H3'	U4H4'	4		U5H6	A3H3'	3.95994		A2H3'	A3H4'	3.6		A4H2''	U1H2''	3.57364
	C1H5	H3'	4		U5H6	A3H5''	4.44488		A2H3'	U4H5'	3.6		A4H2'	C2H2''	3.65406
	C1H6	A2H5'	4		U5H6	C6H5'	4.44488		A2H4'	C1H4'	3.6		A4H2''	C2H2''	3.65406
	C1H6	U4H6	4		C6H1'	U1H1'	4.98921		A2H4'	C1H5'	3.6		A4H2'	C6H2''	3.57364
	A2H1'	H5'	4		C6H1'	U1H5	4.44488		A2H4'	C1H5''	3.6		A4H2''	C6H2''	3.57364
	A2H1'	H5''	4		C6H1'	U1H5'	4.44488		A2H4'	U4H5'	3.6		A4H3'	U1H2'	3.57364
	A2H1'	A3H2'	4		C6H1'	U1H5''	4.44488		A2H4'	U4H5''	3.6		A4H3'	U1H2''	3.57364
	A2H1'	A3H3'	4		C6H1'	C2H1'	4.98921		A2H5'	C1H5'	3.6		A4H3'	U1H4'	4.5025
	A2H1'	U4H3'	4		C6H1'	C2H2'	4.44488		A2H5'	C1H5''	3.6		A4H3'	U1H5'	4.20829
	A2H2	H2'	4		C6H1'	C2H3'	4.44488		A2H5'	A2H2''	3.6		A4H3'	U1H5''	4.20829
	A2H2'	C1H2'	4		C6H1'	C2H4'	4.44488		A2H5''	C1H5'	3.6		A4H3'	C2H2'	3.57364
	A2H2'	C1H3'	4		C6H1'	C2H5	4.44488		A2H5''	C1H5''	3.6		A4H3'	C2H2''	3.65406
	A2H2'	A3H2'	4		C6H1'	C2H5''	4.44488		A2H8	C1H5'	3.6		A4H3'	C2H4'	4.5025
	A2H2'	A3H3'	4		C6H1'	A3H2'	4.44488		A2H8	C1H5''	3.6		A4H3'	C2H5'	4.5025
	A2H3'	A3H2'	4		C6H1'	A3H3'	3.95994		A2H8	A3H4'	3.6		A4H3'	C2H5''	4.5025
	A2H3'	A3H3'	4		C6H1'	A3H4'	4.44488		A2H8	A3H5''	3.6		A4H3'	A3H5'	4.01128
	A2H3'	A3H5''	4		C6H1'	A3H5''	4.44488		A3H1'	C1H5'	3.6		A4H3'	A3H5''	4.01128
	A2H5'	U4H3'	4		C6H1'	A4H1'	4.98921		A3H1'	C1H5''	3.6		A4H3'	U5H2'	3.57364
	A2H5'	U4H4'	4		C6H1'	A4H3'	3.95994		A3H1'	A2H5''	3.6		A4H3'	U5H2''	3.57364
	A2H5'	U4H5'	4		C6H1'	A4H4'	4.44488		A3H1'	U4H1'	3.6		A4H3'	C6H2'	3.57364
	A2H5''	U4H3'	4		C6H1'	A4H5''	4.44488		A3H2	C1H5'	3.6		A4H3'	C6H2''	3.57364
	A2H5''	U4H4'	4		C6H1'	U5H5''	4.44488		A3H2	C1H5''	3.6		A4H3'	C6H4'	4.20829
	A2H8	C1H5'	4		C6H2'	U1H5'	4.44488		A3H2'	A2H2'	3.6		A4H3'	C6H5'	4.01128
	A2H8	C1H5''	4		C6H2'	U1H5''	4.44488		A3H2''	A2H2'	3.6		A4H3'	C6H5''	4.01128
	A2H8	A3H2'	4		C6H2'	U5H5''	4.44488		A3H3'	C1H3'	3.6		A4H4'	U1H2'	4.01128
	A2H8	A3H5'	4		C6H3'	U1H5'	4.44488		A3H3'	C1H4'	3.6		A4H4'	U1H5'	4.72365
	A3H1'	C1H1'	4		C6H3'	U1H5''	4.44488		A3H3'	C1H5'	3.6		A4H4'	C2H2''	4.10155
	A3H1'	A2H4'	4		C6H4'	U1H5'	4.44488		A3H3'	C1H5''	3.6		A4H4'	C2H5'	5.05389
	A3H1'	U4H2'	4		C6H4'	U1H5''	4.44488		A3H3'	A2H2'	3.6		A4H4'	C2H5''	5.05389
	A3H1'	U4H3'	4		C6H5	U1H1'	4.98921		A3H3'	A2H2''	3.6		A4H4'	A3H5''	4.5025
	A3H1'	U4H4'	4		C6H5	U1H2'	4.44488		A3H3'	A2H5''	3.6		A4H4'	U5H2'	4.01128
	A3H1'	U4H5	4		C6H5	U1H3'	4.44488		A3H3'	U4H2'	3.6		A4H4'	U5H2''	4.01128
	A3H1'	U4H5''	4		C6H5	U1H5	4.44488		A3H3'	U4H2''	3.6		A4H4'	U5H2''	4.01128
	A3H2	A2H1'	4		C6H5	U1H5'	4.44488		A3H3'	U4H3'	3.6		A4H4'	C6H2'	4.01128
	A3H2	A2H2	4		C6H5	U1H5''	4.44488		A3H4'	C1H5'	3.6		A4H4'	C6H2''	4.01128
	A3H2	H2'	4		C6H5	C2H1'	4.98921		A3H4'	C1H5''	3.6		A4H4'	C6H5''	4.5025
	A3H2	H8	4		C6H5	C2H2'	4.44488		A3H4'	A2H2'	3.6		A4H5'	U1H2'	3.74916
	A3H2'	C1H4'	4		C6H5	C2H4'	4.44488		A3H4'	A2H5''	3.6		A4H5'	U1H2''	3.74916
	A3H2'	H5''	4		C6H5	C2H5	4.44488		A3H5'	A2H2'	3.6		A4H5'	U1H5'	4.41498
	A3H3'	U4H5''	4		C6H5	C2H5''	4.44488		A3H5'	U4H2'	3.6		A4H5'	C2H2''	3.83353
	A3H4'	U4H3'	4		C6H5	A3H3'	3.95994		A3H5'	U4H2''	3.6		A4H5'	C6H2'	3.74916
	A3H4'	U4H4'	4		C6H5	A3H4'	4.44488		A3H5''	C1H4'	3.6		A4H5'	C6H2''	3.74916
	A3H5'	A2H5''	4		C6H5	A3H5''	4.44488		A3H5''	C1H5'	3.6		A4H5''	U1H2'	3.74916
	A3H5'	H2'	4		C6H5	A4H1'	4.98921		A3H5''	C1H5''	3.6		A4H5''	U1H5'	4.41498
	A3H5'	U4H3'	4		C6H5	A4H4'	4.44488		A3H5''	A2H5'	3.6		A4H5''	C2H2''	3.83353
	A3H5'	U4H4'	4		C6H5	A4H5''	4.44488		A3H5''	A2H5''	3.6		A4H5''	A3H5''	4.20829
	A3H5''	U4H2'	4		C6H5''	U1H5'	4.44488		A3H5''	U4H4'	3.6		A4H5''	U5H2'	3.74916
	A3H5''	U4H5''	4		C6H5''	U1H5''	4.44488		A3H5''	U4H5''	3.6		A4H5''	U5H2''	3.74916
	A3H8	C1H6	4		C6H6	U1H1'	4.98921		A3H8	C1H5'	3.6		A4H5''	C6H2'	3.74916
	A3H8	A2H2	4		C6H6	U1H5'	4.44488		A3H8	C1H5''	3.6		A4H5''	C6H2''	3.74916
	A3H8	A2H5'	4		C6H6	U1H5''	4.44488		U4H1'	C1H5'	3.6		A4H8	U1H2'	4.01128
	A3H8	A2H5''	4		C6H6	C2H1'	4.98921		U4H1'	C1H5''	3.6		A4H8	U1H2''	4.01128
	A3H8	U4H3'	4		C6H6	C2H3'	4.44488		U4H3'	C1H5'	3.6		A4H8	U1H3'	4.5025
	A3H8	U4H4'	4		C6H6	C2H4'	4.44488		U4H3'	C1H5''	3.6		A4H8	U1H4'	5.05389
	U4H1'	C1H5	4		C6H6	C2H5''	4.44488		U4H3'	A2H2'	3.6		A4H8	U1H5	4.5025
	U4H1'	A3H2'	4		C6H6	A3H2'	4.44488		U4H3'	A2H4'	3.6		A4H8	U1H5'	4.72365
	U4H5	H2'	4		C6H6	A3H3'	3.95994		U4H3'	A3H2'	3.6		A4H8	U1H6	4.5025
	U4H5	H3'	4		C6H6	A3H4'	4.44488		U4H3'	A3H2''	3.6		A4H8	C2H2'	4.01128
	U4H5	H4'	4		C6H6	A3H5''	4.44488		U4H3'	A3H4'	3.6		A4H8	C2H2''	4.10155
	U4H6	C1H4'	4		C6H6	A4H1'	4.98921		U4H4'	C1H2''	3.6		A4H8	C2H3'	4.5025
					C6H6	A4H2'	4.44488		U4H4'	C1H5'	3.6		A4H8	C2H5	4.5025
					C6H6	A4H3'	3.95994		U4H4'	C1H5''	3.6		A4H8	C2H5'	5.05389
					C6H6	A4H4'	4.44488		U4H4'	A2H2''	3.6		A4H8	C2H5''	5.05389
									U4H5	C1H5'	3.6		A4H8	C2H6	4.5025
					U1H1'	C2H5''	4		U4H5	C1H5''	3.6		A4H8	A3H5''	4.5025
					U1H1'	A3H4'	4		U4H5''	C1H4'	3.6		A4H8	A4H2	5.05389
					U1H1'	A4H4'	4		U4H5''	C1H5'	3.6		A4H8	U5H2'	4.01128
					U1H2'	U5H5''	4		U4H5''	C1H5''	3.6		A4H8	U5H3'	4.5025
					U1H3'	U5H5''	4		U4H5''	A2H5'	3.6		A4H8	C6H1'	4.5025
					U1H2'	C6H2'	4		U4H5''	U4H2'	3.6		A4H8	C6H2'	4.01128
					U1H3'	C6H2'	4		U4H5''	U4H2''	3.6		A4H8	C6H2''	4.01128
					U1H2'	C6H3'	4		U4H6	C1H5'	3.6		A4H8	C6H3'	4.5025
					U1H3'	C6H3'	4		U4H6	C1H5''	3.6		U5H1'	U1H2'	3.57364
					U1H4'	A3H5''	4		U4H6	A3H5'	3.6		U5H1'	U1H3'	4.01128
					U1H4'	C6H2'	4						U5H1'	U1H5'	4.20829
					U1H5	A4H2'	4		C1H3'	U4H4'	3		U5H1'	A3H2'	3.57364
					U1H5	U5H5	4		C1H4'	A2H5'	3		U5H1'	A3H2''	3.57364
					U1H6	C2H1'	4		C1H5	C1H2'	3		U5H2'	C2H2''	3.2554
					U1H6	C2H2'	4		C1H5'	C1H2'	3		U5H2''	C2H2''	3.2554
					U1H6	A4H4'	4		C1H5''	C1H2'	3		U5H3'	U1H2'	3.57364
					U1H6	A4H5'	4		A2H1'	A3H2'	3		U5H3'	U1H2''	3.57364
					C2H2'	C6H5'	4		A2H1'	A3H2''	3		U5H3'	U1H5'	4.20829
					C2H3'	C6H5'	4		A2H1'	U4H5'	3		U5H3'	C2H2''	3.65406
					C2H4'	U1H4'	4		A2H2	A3H2'	3		U5H3'	C2H5'	4.5025
					C2H4'	U5H5''	4		A2H2	A3H2''	3		U5H3'	C2H5''	4.5025
					C2H4'	C6H5'	4		A2H2''	A3H2'	3		U5H3'	A3H2'	3.57364
					C2H5	H5''	4		A2H2''	A3H2''	3		U5H3'	A3H2''	3.57364
					C2H5	U5H1'	4		A2H3'	A3H2'	3		U5H3'	A3H4'	4.5025
					C2H5'	C6H3'	4		A2H3'	A3H2''	3		U5H3'	A3H5''	4.01128
					C2H6	A3H5''	4		A2H4'	C1H2'	3		U5H3'	C6H2'	3.57364
					C2H6	U5H2'	4		A2H4'	C1H2''	3		U5H3'	C6H2''	3.57364
					C2H6	U5H3'	4		A2H5'	A2H2'	3		U5H4'	U1H2'	4.01128
					C2H6	C6H1'	4		A2H5''	C1H4'	3		U5H4'	U1H2''	4.01128
					C2H6	C6H2'	4		A2H5''	A2H2'	3		U5H4'	C2H2''	4.10155
					C2H6	C6H3'	4		A2H5''	A2H2''	3		U5H4'	A3H2'	4.01128
					C2H6	C6H4'	4		A2H8	A3H2'	3		U5H4'	C6H2''	4.01128
					A3H1'	U1H4'	4		A2H8	A3H2''	3		U5H5	U1H2'	3.57364
					A3H1'	C2H5'	4		A2H8	U4H4'	3		U5H5	U1H2''	3.57364
					A3H1'	C2H5''	4		A3H1'	A2H2'	3		U5H5	U1H3'	4.01128
					A3H1'	H5''	4		A3H1'	A3H5'	3		U5H5	U1H4'	4.5025
					A3H1'	A4H5''	4		A3H1'	U4H5	3		U5H5	U1H4'	4.5025
					A3H1'	U5H4'	4		A3H2	A3H2'	3		U5H5	U1H5'	4.20829
					A3H1'	C6H2'	4		A3H2	A3H2''	3		U5H5	C2H2'	3.57364
					A3H1'	C6H5''	4		A3H2	U4H2'	3		U5H5	C2H2''	3.65406
					A3H2	C2H1'	4		A3H2	U4H2''	3		U5H5	C2H3'	4.01128
					A3H2	C2H3'	4		A3H3'	C1H5	3		U5H5	C2H4'	4.5025
					A3H2	H4'	4		A3H3'	A2H2	3		U5H5	C2H5'	4.5025
					A3H2'	U1H2'	4		A3H3'	A2H4'	3		U5H5	C2H5''	4.5025
					A3H2'	U1H3'	4		A3H3'	U4H4'	3		U5H5	A3H2'	3.57364
					A3H2'	C2H4'	4		A3H4'	A2H2''	3		U5H5	A3H2''	3.57364
					A3H2'	C2H5''	4		A3H4'	U4H4'	3		U5H5	A3H4'	4.5025
					A3H2'	U5H3'	4		A3H5'	C1H5'	3		U5H5	A3H5'	4.01128
					A3H3'	U1H2'	4		A3H5'	C1H5''	3		U5H5	A3H5''	4.01128
					A3H3'	U1H3'	4		A3H5'	A2H5''	3		U5H5	U5H5''	4.01128
					A3H3'	A4H5''	4		A3H5''	A2H2'	3		U5H5	C6H2'	3.57364
					A3H4'	U1H4'	4		A3H5''	A2H2''	3		U5H5	C6H2''	3.57364
					A3H4'	C6H5'	4		A3H8	U4H5'	3		U5H5	C6H3'	4.01128
					A3H5'	U1H4'	4		U4H1'	A2H1'	3		U5H5	C6H4'	4.20829
					A3H5'	C6H5'	4		U4H1'	A3H2'	3		U5H5	C6H5'	4.01128
					A3H5''	U5H2'	4		U4H1'	A3H2''	3		U5H5	C6H5''	4.01128
					A3H5''	C6H4'	4		U4H3'	A3H5'	3		U5H5'	U1H2'	3.57364
					A3H8	A4H3'	4		U4H4'	C1H4'	3		U5H5'	C2H2''	3.65406
					A3H8	U5H2'	4		U4H4'	A3H2'	3		U5H5'	A3H2'	3.57364
					A3H8	C6H4'	4		U4H4'	A3H2''	3		U5H5'	A3H2''	3.57364
					A4H1'	U1H1'	4		U4H5	A3H4'	3		U5H5'	C6H2'	3.57364
					A4H1'	C2H3'	4		U4H5'	C1H5'	3		U5H5'	C6H2''	3.57364
					A4H1'	C2H5'	4		U4H5'	C1H5''	3		U5H5''	U1H2'	3.57364
					A4H1'	C2H5''	4		U4H5'	A2H5''	3		U5H5''	U1H2''	3.57364
					A4H1'	A3H4'	4		U4H5'	A3H2'	3		U5H5''	U1H5'	4.20829
					A4H1'	U5H3'	4		U4H5'	A3H2''	3		U5H5''	C2H2''	3.65406
					A4H1'	U5H4'	4		U4H5'	U4H2'	3		U5H5''	C2H5'	4.5025
					A4H1'	U5H5'	4		U4H5'	U4H2''	3		U5H5''	C2H5''	4.5025
					A4H1'	C6H4'	4						U5H5''	A3H2'	3.57364
					A4H2	C2H5'	4						U5H5''	A3H2''	3.57364
					A4H2	U5H3'	4						U5H5''	C6H2'	3.57364
					A4H2	U5H4'	4						U5H5''	C6H2''	3.57364
					A4H2	U5H5'	4						U5H6	U1H2'	3.57364
					A4H2'	U1H5'	4						U5H6	U1H2''	3.57364
					A4H2'	U1H5''	4						U5H6	U1H3'	4.01128
					A4H2'	C6H2'	4						U5H6	U1H5	4.01128
					A4H2'	C6H5''	4						U5H6	U1H5'	4.20829
					A4H3'	C2H4'	4						U5H6	C2H2'	3.57364
					A4H3'	A3H5'	4						U5H6	C2H2''	3.65406
					A4H4'	C6H5'	4						U5H6	C2H3'	4.01128
					A4H5'	U1H4'	4						U5H6	C2H5'	4.5025
					A4H8	C2H1'	4						U5H6	C2H5''	4.5025
					A4H8	C2H4'	4						U5H6	A3H1'	3.74916
					A4H8	C2H5'	4						U5H6	A3H2'	3.57364
					A4H8	C2H5''	4						U5H6	A3H2''	3.57364
					A4H8	U5H5'	4						U5H6	A3H4'	4.5025
					A4H8	C6H3'	4						U5H6	A3H5'	4.01128
					U5H1'	U1H2'	4						U5H6	A3H5''	4.01128
					U5H1'	U1H3'	4						U5H6	C6H1'	4.01128
					U5H1'	U1H4'	4						U5H6	C6H2'	3.57364
					U5H1'	C2H2'	4						U5H6	C6H2''	3.57364
					U5H1'	A4H3'	4						U5H6	C6H3'	4.01128
					U5H3'	U1H4'	4						U5H6	C6H5'	4.01128
					U5H4'	C6H3'	4						U5H6	C6H5''	4.01128
					U5H5	C2H5'	4						C6H1'	U1H2'	3.57364
					U5H5	U5H4'	4						C6H1'	U1H2''	3.57364
					U5H5	U5H5''	4						C6H1'	U1H3'	4.01128
					U5H5'	U1H4'	4						C6H1'	U1H4'	4.5025
					U5H6	U1H2'	4						C6H1'	U1H5'	4.20829
					U5H6	U1H3'	4						C6H1'	C2H2''	3.65406
					U5H6	A3H1'	4						C6H1'	C2H3'	4.01128
					C6H1'	U1H2'	4						C6H1'	C2H5'	4.5025
					C6H1'	U1H3'	4						C6H1'	C2H5''	4.5025
					C6H1'	U1H4'	4						C6H1'	A3H2'	3.57364
					C6H1'	C2H5'	4						C6H1'	A3H2''	3.57364
					C6H1'	A4H2'	4						C6H1'	A3H4'	4.5025
					C6H1'	U5H4'	4						C6H1'	A3H5'	4.01128
					C6H3'	C2H5''	4						C6H1'	A3H5''	4.01128
					C6H3'	U5H5''	4						C6H1'	A4H2'	4.01128
					C6H5	C2H5'	4						C6H1'	A4H2''	4.01128
					C6H5	A3H2'	4						C6H1'	A4H4'	4.5025
					C6H5	A4H3'	4						C6H1'	A4H5'	4.20829
					C6H5	C6H2'	4						C6H1'	A4H5''	4.20829
					C6H5'	C2H5''	4						C6H1'	U5H2'	3.57364
					C6H5'	A3H5''	4						C6H1'	U5H2''	3.57364
					C6H6	U1H5	4						C6H1'	U5H3'	4.01128
					C6H6	C2H2'	4						C6H1'	U5H4'	4.5025
					C6H6	C2H5	4						C6H1'	U5H5	4.01128
					C6H6	A4H5'	4						C6H1'	U5H5'	4.01128
													C6H1'	U5H5''	4.01128
					U1H1'	C2H3'	3.3						C6H2'	C2H2''	3.2554
					U1H1'	A4H5'	3.3						C6H2''	C2H2''	3.2554
					U1H2'	A3H5'	3.3						C6H3'	U1H2'	3.57364
					U1H3'	A3H5'	3.3						C6H3'	C2H2''	3.65406
					U1H4'	U5H5''	3.3						C6H3'	C2H5'	4.5025
					C2H1'	U5H3'	3.3						C6H3'	C2H5''	4.5025
					C2H1'	U5H4'	3.3						C6H3'	A3H2'	3.57364
					C2H2'	U5H5''	3.3						C6H3'	A3H2''	3.57364
					C2H3'	U5H2'	3.3						C6H3'	A3H5''	4.01128
					C2H3'	C6H3'	3.3						C6H3'	A4H2'	4.01128
					C2H3'	C6H4'	3.3						C6H3'	A4H2'	4.01128
					C2H5	A3H4'	3.3						C6H3'	A4H2''	4.01128
					C2H5'	U1H4'	3.3						C6H3'	U5H2'	3.57364
					C2H5'	C6H2'	3.3						C6H3'	U5H5'	4.01128
					C2H5'	C6H5'	3.3						C6H3'	U5H5''	4.01128
					C2H6	U1H4'	3.3						C6H4'	U1H5'	4.41498
					A3H1'	U1H2'	3.3						C6H4'	A3H2'	3.74916
					A3H1'	U1H3'	3.3						C6H4'	A3H2''	3.74916
					A3H1'	C2H4'	3.3						C6H5	U1H2'	3.57364
					A3H1'	U5H1'	3.3						C6H5	U1H3'	4.01128
					A3H1'	U5H2'	3.3						C6H5	U1H5'	4.20829
					A3H1'	U5H5	3.3						C6H5	C2H3'	4.01128
					A3H1'	C6H4'	3.3						C6H5	C2H5'	4.5025
					A3H2	C2H5	3.3						C6H5	C2H5''	4.5025
					A3H2	A4H4'	3.3						C6H5	A3H2'	3.57364
					A3H2	A4H5'	3.3						C6H5	A3H2''	3.57364
					A3H2'	U5H2'	3.3						C6H5	A3H4'	4.5025
					A3H2'	C6H3'	3.3						C6H5	A3H5''	4.01128
					A3H2'	C6H4'	3.3						C6H5	A4H4'	4.5025
					A3H3'	U5H2'	3.3						C6H5	C6H3'	4.01128
					A3H3'	U5H3'	3.3						C6H5'	U1H2'	3.57364
					A3H3'	C6H3'	3.3						C6H5'	U1H5'	4.20829
					A3H3'	C6H4'	3.3						C6H5'	A3H2''	3.57364
					A3H4'	U5H2'	3.3						C6H5''	U1H2'	3.57364
					A3H4'	C6H3'	3.3						C6H5''	U1H2''	3.57364
					A3H4'	C6H4'	3.3						C6H5''	U1H5'	4.20829
					A3H5'	C2H5''	3.3						C6H5''	C2H2'	3.57364
					A3H5'	U5H5''	3.3						C6H5''	C2H2''	3.65406
					A3H5'	C6H2'	3.3						C6H5''	A3H2'	3.57364
					A3H5'	C6H5''	3.3						C6H5''	A3H2''	3.57364
					A3H8	U1H4'	3.3						C6H6	U1H2'	3.57364
					A3H8	C6H3'	3.3						C6H6	U1H2''	3.57364
					A3H8	C6H5'	3.3						C6H6	U1H3'	4.01128
					A4H1'	C2H1'	3.3						C6H6	U1H4'	4.5025
					A4H1'	A3H3'	3.3						C6H6	U1H4'	4.5025
					A4H2'	U1H4'	3.3						C6H6	U1H5'	4.20829
					A4H2'	A3H5''	3.3						C6H6	C2H2''	3.65406
					A4H2'	C6H3'	3.3						C6H6	C2H3'	4.01128
					A4H2'	C6H5'	3.3						C6H6	C2H5	4.01128
					A4H3'	U1H2'	3.3						C6H6	C2H5'	4.5025
					A4H3'	U1H3'	3.3						C6H6	C2H5''	4.5025
					A4H3'	C2H5''	3.3						C6H6	C2H6	4.01128
					A4H3'	A3H4'	3.3						C6H6	A3H2'	3.57364
					A4H4'	A3H5''	3.3						C6H6	A3H2''	3.57364
					A4H4'	C6H3'	3.3						C6H6	A3H4'	4.5025
					A4H5'	A3H5''	3.3						C6H6	A3H5''	4.01128
					A4H5'	U5H5''	3.3						C6H6	A4H1'	4.01128
					A4H5'	C6H2'	3.3						C6H6	A4H4'	4.5025
					A4H5'	C6H3'	3.3						C6H6	U5H5''	4.01128
					A4H5''	C6H5''	3.3						U1H1'	U1H5''	3
					A4H8	U1H2'	3.3						U1H1'	C2H1'	3
					A4H8	U1H3'	3.3						U1H1'	C2H2'	3
					A4H8	U5H2'	3.3						U1H1'	A3H1'	3
					A4H8	U5H4'	3.3						U1H1'	U5H1'	3
					A4H8	C6H4'	3.3						U1H1'	U5H1'	3
					U5H3'	C2H5''	3.3						U1H3'	C2H4'	3
					U5H4'	U1H4'	3.3						U1H3'	A4H4'	3
					U5H4'	C6H2'	3.3						U1H4'	C6H2'	3
					U5H5	C2H2'	3.3						U1H4'	C6H2''	3
					U5H5	A3H5'	3.3						U1H5	U5H5	3
					U5H5	A4H5'	3.3						U1H5'	U1H2''	3
					U5H5	U5H5'	3.3						U1H5''	U1H2''	3
					U5H5'	A3H5''	3.3						U1H6	U1H5''	3
					U5H5'	C6H2'	3.3						U1H6	C2H5	3
					U5H5'	C6H3'	3.3						U1H6	C2H6	3
					U5H5'	C6H5''	3.3						C2H1'	U1H5	3
					C6H1'	U5H1'	3.3						C2H1'	U1H5''	3
					C6H1'	U5H5	3.3						C2H1'	A3H2'	3
					C6H1'	U5H5'	3.3						C2H1'	A3H2''	3
					C6H5	U5H5'	3.3						C2H1'	A4H2'	3
													C2H1'	A4H2''	3
													C2H1'	C6H2'	3
													C2H3'	U1H5''	3
													C2H3'	A4H4'	3
													C2H4'	U1H2'	3
													C2H5	U1H3'	3
													C2H5	U1H5	3
													C2H5	U1H5''	3
													C2H5	C2H4'	3
													C2H5'	A3H2'	3
													C2H5'	A3H2''	3
													C2H5''	A3H2'	3
													C2H5''	A3H2''	3
													C2H6	U1H2''	3
													C2H6	U1H4'	3
													C2H6	U1H5''	3
													C2H6	A3H5''	3
													A3H1'	U1H5	3
													A3H1'	U1H5''	3
													A3H1'	C2H2'	3
													A3H1'	C6H4'	3
													A3H1'	C6H5'	3
													A3H2	U1H5''	3
													A3H2	U1H6	3
													A3H3'	U1H4'	3
													A3H3'	U1H5''	3
													A3H3'	C2H4'	3
													A3H3'	U5H5'	3
													A3H3'	C6H5'	3
													A3H3'	C6H5''	3
													A3H4'	U1H2''	3
													A3H4'	U1H5''	3
													A3H4'	U5H4'	3
													A3H5'	U1H2''	3
													A3H5'	A4H2'	3
													A3H5'	A4H2''	3
													A3H5'	C6H2'	3
													A3H8	U1H3'	3
													A3H8	U1H4'	3
													A3H8	U1H5''	3
													A3H8	A4H5'	3
													A3H8	A4H5''	3
													A3H8	U5H1'	3
													A3H8	U5H4'	3
													A3H8	U5H5'	3
													A3H8	C6H4'	3
													A4H1'	U1H2'	3
													A4H1'	U1H5''	3
													A4H1'	C2H1'	3
													A4H1'	C6H5	3
													A4H2	U1H1'	3
													A4H2	U1H4'	3
													A4H2	U1H5''	3
													A4H2	A3H5'	3
													A4H2	A4H2'	3
													A4H2	A4H2''	3
													A4H2	U5H2'	3
													A4H2	U5H3'	3
													A4H2	U5H4'	3
													A4H2	C6H2'	3
													A4H2	C6H3'	3
													A4H2'	U5H2'	3
													A4H2''	U5H2'	3
													A4H2'	C6H2'	3
													A4H2''	C6H2'	3
													A4H3'	C6H3'	3
													A4H4'	U1H5''	3
													A4H4'	U5H5'	3
													A4H5'	U1H5''	3
													A4H5'	C6H5'	3
													A4H5''	U1H5''	3
													A4H5''	C2H5'	3
													A4H5''	C2H5''	3
													A4H5''	A3H5'	3
													A4H5''	C6H5'	3
													A4H8	U1H5''	3
													A4H8	A3H5'	3
													A4H8	U5H5''	3
													U5H1'	U1H5	3
													U5H1'	U1H5''	3
													U5H1'	A4H2'	3
													U5H1'	A4H2''	3
													U5H1'	C6H2'	3
													U5H2'	U1H2''	3
													U5H2'	C6H2''	3
													U5H3'	U1H3'	3
													U5H3'	U1H5''	3
													U5H3'	C2H3'	3
													U5H3'	A4H4'	3
													U5H4'	U1H5''	3
													U5H4'	C2H5'	3
													U5H4'	C2H5''	3
													U5H4'	A3H5'	3
													U5H4'	C6H2'	3
													U5H4'	C6H5'	3
													U5H5	U1H5''	3
													U5H5''	U1H5''	3
													U5H5''	A3H5'	3
													U5H5''	U5H2'	3
													U5H6	U1H5''	3
													U5H6	C2H4'	3
													U5H6	C2H4'	3
													U5H6	A4H4'	3
													U5H6	A4H5'	3
													U5H6	C6H4'	3
													C6H1'	U1H5''	3
													C6H1'	C2H1'	3
													C6H1'	U5H1'	3
													C6H1'	C6H5	3
													C6H2'	U1H2''	3
													C6H2'	U5H2''	3
													C6H2''	U5H2''	3
													C6H3'	U1H4'	3
													C6H3'	U1H5'	3
													C6H3'	A3H4'	3
													C6H3'	A3H5'	3
													C6H3'	A4H4'	3
													C6H4'	U1H2''	3
													C6H4'	U1H5''	3
													C6H4'	C2H2''	3
													C6H5	U1H2''	3
													C6H5	U1H5	3
													C6H5	U1H5''	3
													C6H5	C2H2''	3
													C6H5	C6H2'	3
													C6H5	C6H2''	3
													C6H5'	U1H2''	3
													C6H5'	U1H5''	3
													C6H5'	C2H2'	3
													C6H5'	A4H2'	3
													C6H5'	A4H2''	3
													C6H5''	A4H2'	3
													C6H5''	A4H2''	3
													C6H5''	C6H2'	3
													C6H6	U1H5''	3
													C6H6	C2H4'	3
													C6H6	A3H5'	3
													C6H6	A4H5''	3
													C6H6	C6H4'	3
													U1H1'	U1H5	3.6
													U1H1'	C2H3'	3.6
													U1H1'	C2H5	3.6
													U1H1'	A3H2'	3.6
													U1H1'	A3H2''	3.6
													U1H1'	U5H3'	3.6
													U1H1'	U5H5	3.6
													U1H2'	C2H2''	3.6
													U1H2'	C6H2'	3.6
													U1H3'	C2H2''	3.6
													U1H3'	A3H4'	3.6
													U1H3'	A3H5''	3.6
													U1H3'	U5H2''	3.6
													U1H3'	C6H3'	3.6
													U1H3'	C6H4'	3.6
													U1H5	U1H3'	3.6
													U1H5	U1H5''	3.6
													U1H5'	U1H2'	3.6
													U1H6	U1H5'	3.6
													U1H6	C2H1'	3.6
													U1H6	A4H1'	3.6
													U1H6	U5H1'	3.6
													U1H6	U5H1'	3.6
													U1H6	C6H4'	3.6
													C2H1'	A4H4'	3.6
													C2H1'	U5H5	3.6
													C2H3'	U1H5'	3.6
													C2H3'	C6H5'	3.6
													C2H5	U1H2'	3.6
													C2H5	U1H4'	3.6
													C2H5	C2H3'	3.6
													C2H5	U5H5	3.6
													C2H5	U5H5'	3.6
													C2H6	A4H1'	3.6
													C2H6	U5H2''	3.6
													A3H1'	C2H2''	3.6
													A3H1'	C2H3'	3.6
													A3H1'	C2H4'	3.6
													A3H1'	U5H5	3.6
													A3H2	U1H1'	3.6
													A3H2	U1H2''	3.6
													A3H2	U1H5	3.6
													A3H2	C2H1'	3.6
													A3H2	U5H1'	3.6
													A3H2	U5H1'	3.6
													A3H2'	C2H2'	3.6
													A3H2'	C2H2''	3.6
													A3H2''	C2H2'	3.6
													A3H2''	C2H2''	3.6
													A3H3'	U1H3'	3.6
													A3H3'	C2H2''	3.6
													A3H3'	C2H3'	3.6
													A3H3'	A4H4'	3.6
													A3H3'	U5H3'	3.6
													A3H3'	U5H4'	3.6
													A3H3'	U5H5''	3.6
													A3H3'	C6H3'	3.6
													A3H3'	C6H4'	3.6
													A3H4'	U1H4'	3.6
													A3H4'	U1H4'	3.6
													A3H4'	C2H2''	3.6
													A3H4'	C2H4'	3.6
													A3H4'	C6H4'	3.6
													A3H5'	C6H2''	3.6
													A3H5''	A4H2'	3.6
													A3H5''	A4H2''	3.6
													A3H8	U1H1'	3.6
													A3H8	C2H5	3.6
													A3H8	A3H2	3.6
													A3H8	A4H1'	3.6
													A3H8	C6H5	3.6
													A3H8	C6H5'	3.6
													A3H8	C6H5''	3.6
													A3H8	C6H6	3.6
													A4H1'	U1H5	3.6
													A4H1'	C2H5	3.6
													A4H2	A3H1'	3.6
													A4H2	A4H5'	3.6
													A4H2	A4H5''	3.6
													A4H2	U5H2''	3.6
													A4H2	U5H5	3.6
													A4H2	C6H5''	3.6
													A4H3'	A3H4'	3.6
													A4H4'	U1H4'	3.6
													A4H4'	C2H4'	3.6
													A4H4'	A3H4'	3.6
													A4H4'	A3H5'	3.6
													A4H4'	C6H4'	3.6
													A4H4'	C6H5'	3.6
													A4H5'	C2H5'	3.6
													A4H5'	C2H5''	3.6
													A4H5'	A3H5'	3.6
													A4H5'	A3H5''	3.6
													A4H5'	C6H5''	3.6
													A4H5''	C6H5''	3.6
													A4H8	U1H1'	3.6
													A4H8	U1H4'	3.6
													A4H8	C2H1'	3.6
													A4H8	C2H4'	3.6
													A4H8	A3H2	3.6
													A4H8	U5H1'	3.6
													A4H8	U5H1'	3.6
													A4H8	U5H2''	3.6
													A4H8	C6H4'	3.6
													A4H8	C6H5'	3.6
													A4H8	C6H5''	3.6
													A4H8	C6H6	3.6
													U5H1'	C6H2''	3.6
													U5H1'	C6H3'	3.6
													U5H3'	A3H5'	3.6
													U5H3'	C6H3'	3.6
													U5H4'	A3H5''	3.6
													U5H4'	C6H5''	3.6
													U5H5	A4H4'	3.6
													U5H5	A4H5'	3.6
													U5H5	U5H4'	3.6
													U5H5''	A3H5''	3.6
													U5H5''	C6H5''	3.6
													U5H6	U1H1'	3.6
													C6H1'	U1H5	3.6
													C6H1'	C2H2'	3.6
													C6H1'	C2H5	3.6
													C6H3'	U1H2''	3.6
													C6H3'	U1H5'	3.6
													C6H3'	A4H5'	3.6
													C6H3'	A4H5''	3.6
													C6H3'	U5H2''	3.6
													C6H3'	U5H4'	3.6
													C6H5'	C2H2''	3.6
													C6H5'	A3H2'	3.6
													C6H5''	U5H2''	3.6
													C6H5''	C6H2''	3.6
													C6H6	U1H1'	3.6
													C6H6	U1H5	3.6
													C6H6	C2H2'	3.6
													C6H6	A3H1'	3.6
													C6H6	A4H5'	3.6
													C6H6	U5H4'	3.6
													C6H6	U5H5	3.6
